# Supplementary material
Source: PubMed Central journal article supplement (PMC2663314)
Supplement: supp_29_8_2011__1.pdf [file supp_29_8_2011__1.pdf]

# **ANGIOPOIETIN 2 IS A PARTIAL AGONIST/ANTAGONIST OF TIE2 SIGNALING IN ENDOTHELIUM**

Hai Tao YUAN,<sup>¶</sup> Eliyahu V. KHANKIN, S. Ananth KARUMANCHI and Samir M. PARIKH

Division of Molecular and Vascular Medicine, Division of Nephrology, Department of Medicine, Beth Israel Deaconess Medical Center, Harvard Medical School, 330 Brookline Avenue, Boston, MA 02215.

## **Corresponding Author:**

<sup>¶</sup>Hai Tao Yuan, Molecular and Vascular Medicine, Division of Nephrology, Department of Medicine, Beth Israel Deaconess Medical Center, Harvard Medical School, 99 Brookline Avenue, RN-380G, Boston, MA 02215 Tel 6176672208; Fax 6176672913 Email: hyuan@bidmc.harvard.edu

## **Running title:**

Ang2 is a partial agonist of Tie2

## **Key words:**

Angiopoietin-2, Tie2, Apoptosis, and Migration

## Supplementary Data

**Figure 1. Tie2 phosphorylation in human dermal microvascular endothelial cells (HDMEC).** Confluent HDMECs or HUVECs were stimulated with 400ng/ml of Ang1, Ang2 or Ang4 for 30 minutes and cell lysates were prepared as described and immunoprecipitated with anti-Tie2. After IP, Western blot for phospho-tyrosine and total Tie2 was performed.

**Figure 2. Ang2 neutralizing antibody blocks Ang2-, but not Ang1-induced phosphorylation of Tie2.** Confluent HUVECs were stimulated with Ang2 and Ang1 (400ng/ml) for 30 minutes in the presence or absence of Ang2 neutralizing antibody (20µg/ml). Cell lysates were prepared as described and immunoprecipitated with anti-Tie2. After IP, Western blot for phospho-tyrosine and total Tie2 was performed sequentially.

**Figure 3. Matrigel-induced tube formation of HUVECs treated with Ang2 siRNAs**  
Matrigel-induced tube formation assay was performed as previously described (48). 48 hours after HUVECs were transfected with Ang2-82, Ang2-84 or NC siRNA,  $2.5 \times 10^4$  cells in 300µl of full medium were inoculated into 48-well plate pre-coated with 100µl Matrigel. The images of tubes formed were taken 24hours after cell inoculation and 3 representative images were depicted (A) alone with the percentage of areas (B) covered by tubes formed by HUVECs treated with different siRNAs (n=6). \*\* indicates a P value < 0.01 comparing cells treated with NC siRNA to those treated with Ang2 specific siRNAs.

**Figure 4. Ang1-dependent Tie2 phosphorylation in HUVECs treated with Ang2 siRNAs**  
80% confluent HUVECs were transfected with NC, Ang2-82 or Ang2-84 siRNA and 48 hours later, cells were stimulated 100ng/ml of Ang1 for 30 min before cell lysates were

prepared and immunoprecipitated with anti-Tie2. After IP, Western blot for phospho-tyrosine and total Tie2 was performed sequentially. Representative blots of three independent experiments (A) are depicted along with Phospho/Total Tie2 (P/T) ratio (B) for bands in A (mean  $\pm$  SD, n=3). The P/T ratio of Tie2 is expressed in arbitrary units with those treated with individual siRNA without Ang1 stimulation (Con) accepted as being equal to 1.0. \* indicates a P value < 0.05 and \*\* indicates a P < 0.01 respectively comparing between the cells stimulated with or without Ang1. ## indicates a P < 0.01 comparing the cells treated Ang2 specific siRNA to those treated with NC siRNA.

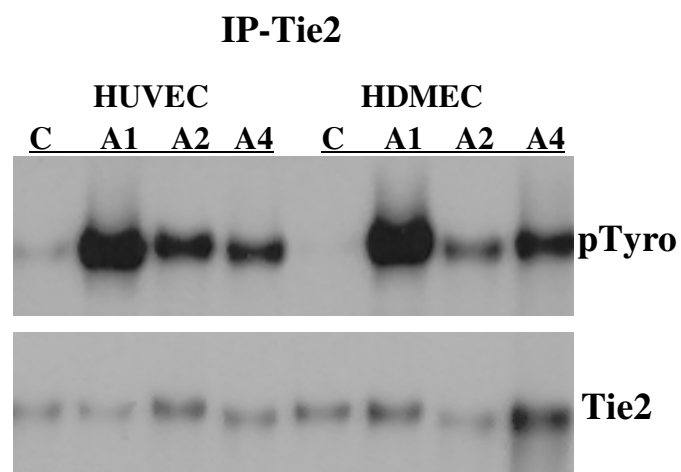

Supplementary Figure 1. Yuan, HT et al

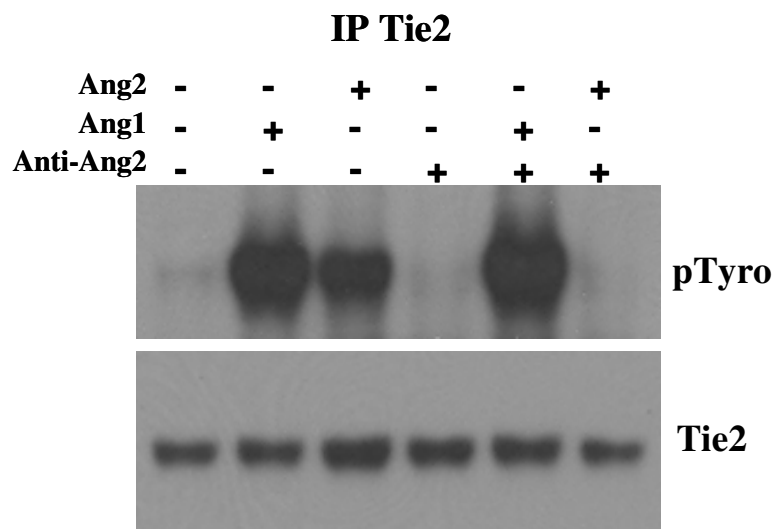

Supplementary Figure 2. Yuan, HT et al

**A**

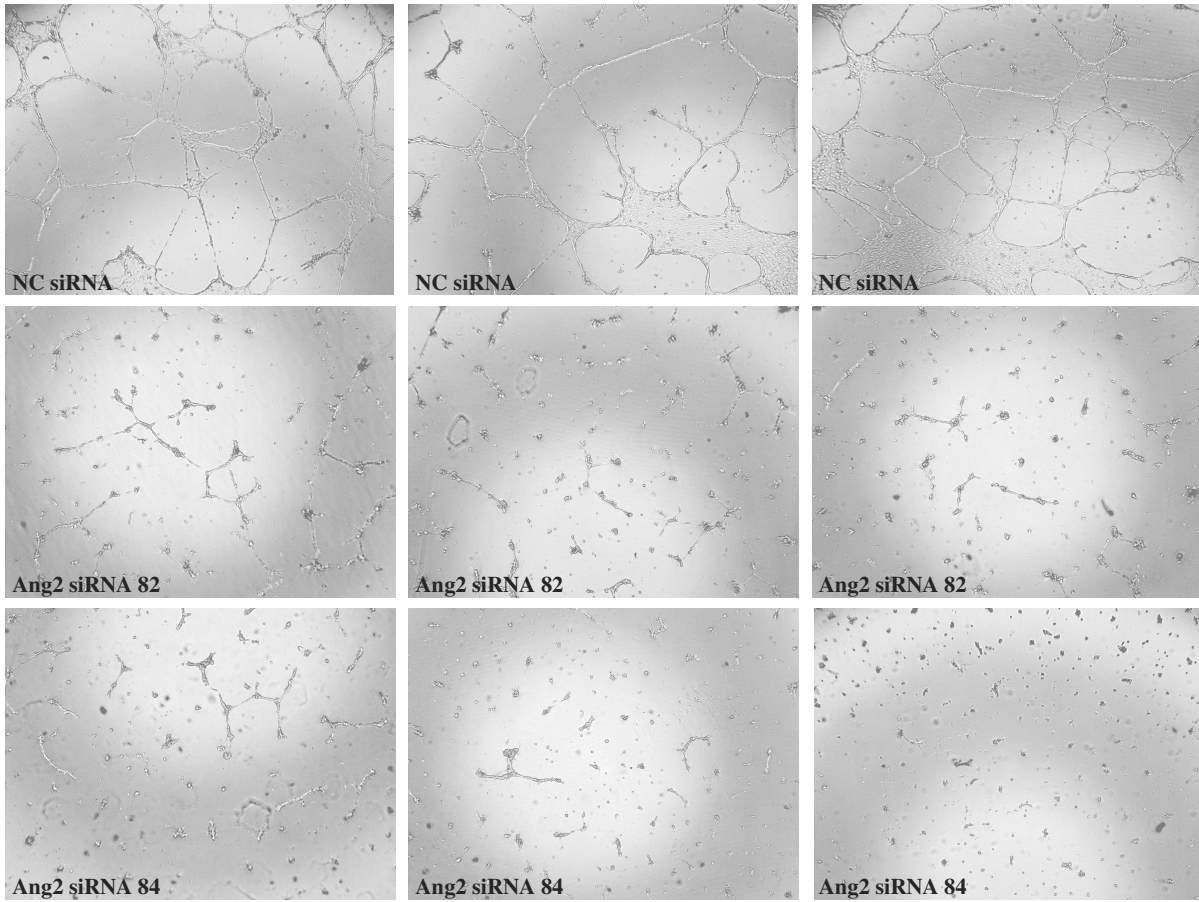

**B**

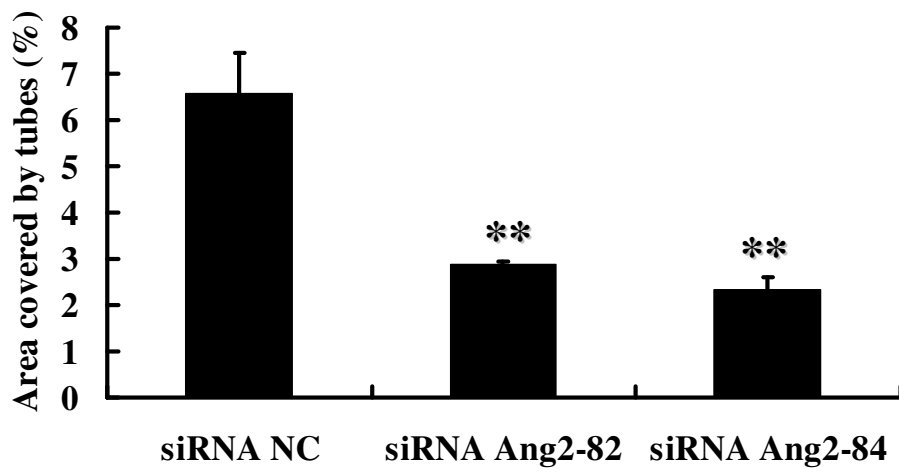

Supplementary Figure 3. Yuan, HT et al

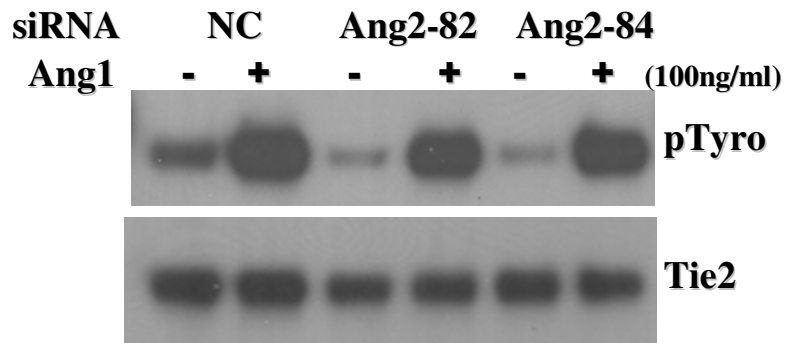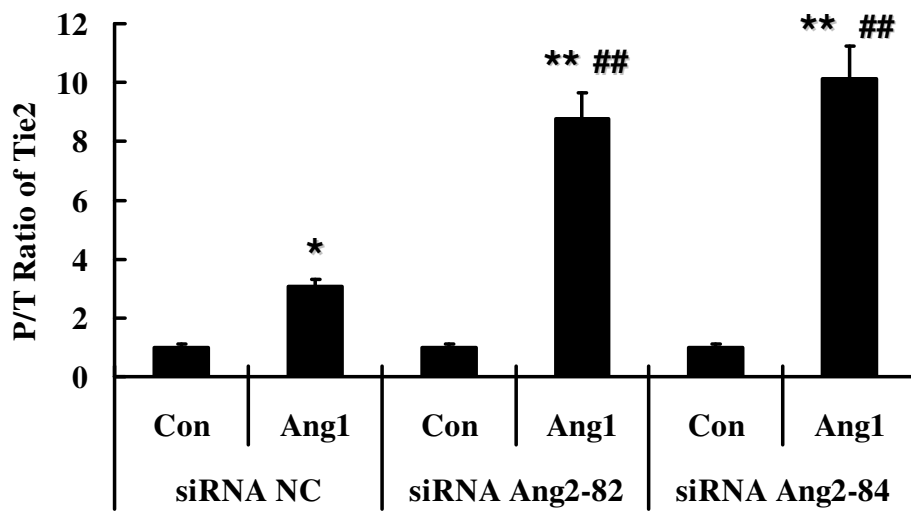

Supplementary Figure 4. Yuan, HT et al
